# Supplementary material for: KCTD12 promotes tumorigenesis by facilitating CDC25B/CDK1/Aurora A-dependent G2/M transition
Source: PubMed Central journal article supplement (PMC5671937; doi:10.1038/onc.2017.287), 2017-09-04
Supplement: onc2017287x1.pdf [file onc2017287x1.pdf]

**Supplementary Table S1.** Differentially expressed proteins between M phase and S phase in HeLa cells.

| ID            | Protein_Name                                                                                       | Fold change (M/S) |
|---------------|----------------------------------------------------------------------------------------------------|-------------------|
| P14635        | G2/mitotic-specific cyclin-B1                                                                      | 9.11942           |
| Q9NR50        | Translation initiation factor eIF-2B subunit gamma                                                 | 6.697576          |
| Q63ZY3-2      | KN motif and ankyrin repeat domain-containing protein 2                                            | 3.58971           |
| P08670        | Vimentin                                                                                           | 2.983188          |
| Q14739        | Lamin-B receptor                                                                                   | 2.460633          |
| P07339        | Cathepsin D; Cathepsin D light chain; Cathepsin D heavy chain                                      | 2.404639          |
| O14974        | Protein phosphatase 1 regulatory subunit 12A                                                       | 2.398944          |
| E9PCT1        | Serine/arginine repetitive matrix protein 1                                                        | 2.330071          |
| <b>Q96CX2</b> | <b>BTB/POZ domain-containing protein KCTD12</b>                                                    | <b>2.110375</b>   |
| G8JLA8        | Transforming growth factor-beta-induced protein ig-h3                                              | 1.993274          |
| P31942        | Heterogeneous nuclear ribonucleoprotein H3                                                         | 1.869595          |
| P52732        | Kinesin-like protein KIF11                                                                         | 1.76965           |
| O00567        | Nucleolar protein 56                                                                               | 1.727572          |
| P48960        | CD97 antigen; CD97 antigen subunit alpha; CD97 antigen subunit beta                                | 1.713247          |
| O43854        | EGF-like repeat and discoidin I-like domain-containing protein 3                                   | 1.704087          |
| Q92522        | Histone H1x                                                                                        | 1.691654          |
| Q9NTZ6        | RNA-binding protein 12                                                                             | 1.679673          |
| P51991        | Heterogeneous nuclear ribonucleoprotein A3                                                         | 1.675949          |
| P18858        | DNA ligase 1; DNA ligase                                                                           | 1.655859          |
| P22626        | Heterogeneous nuclear ribonucleoproteins A2/B1                                                     | 1.627623          |
| P26006-1      | Integrin alpha-3; Integrin alpha-3 heavy chain; Integrin alpha-3 light chain                       | 1.619898          |
| P14866        | Heterogeneous nuclear ribonucleoprotein L                                                          | 1.618746          |
| Q49A26        | Putative oxidoreductase GLYR1                                                                      | 1.617172          |
| P20700        | Lamin-B1                                                                                           | 1.576901          |
| P10909-2      | Clusterin; Clusterin beta chain; Clusterin alpha chain; Clusterin                                  | 1.575963          |
| Q8IY81        | Putative rRNA methyltransferase 3                                                                  | 1.571082          |
| P22087        | rRNA 2-O-methyltransferase fibrillarin; rRNA/tRNA 2-O-methyltransferase fibrillarin-like protein 1 | 1.568467          |
| Q96EA4        | Protein Spindly                                                                                    | 1.554616          |
| Q13435        | Splicing factor 3B subunit 2                                                                       | 1.547653          |
| Q9UBW8        | COP9 signalosome complex subunit 7a                                                                | 1.543287          |
| P02545        | Prelamin-A/C; Lamin-A/C                                                                            | 1.530689          |
| Q9P2N5        | RNA-binding protein 27                                                                             | 0.649548          |

|          |                                                                                                       |          |
|----------|-------------------------------------------------------------------------------------------------------|----------|
| P18031   | Tyrosine-protein phosphatase non-receptor type 1                                                      | 0.646643 |
| Q3KQV9   | UDP-N-acetylhexosamine pyrophosphorylase-like protein 1                                               | 0.644095 |
| Q9H307   | Pinin                                                                                                 | 0.640999 |
| E7EVA0   | Microtubule-associated protein; Microtubule-associated protein 4                                      | 0.631046 |
| Q8NF37   | Lysophosphatidylcholine acyltransferase 1                                                             | 0.623867 |
| O60437   | Periplakin                                                                                            | 0.616209 |
| H9KV28   | Protein diaphanous homolog 1                                                                          | 0.605833 |
| P61978-2 | Heterogeneous nuclear ribonucleoprotein K                                                             | 0.590422 |
| Q9Y6G9   | Cytoplasmic dynein 1 light intermediate chain 1                                                       | 0.572449 |
| P62140   | Serine/threonine-protein phosphatase PP1-beta catalytic subunit; Serine/threonine-protein phosphatase | 0.572188 |
| Q96TA1   | Niban-like protein 1                                                                                  | 0.546986 |
| Q08945   | FACT complex subunit SSRP1                                                                            | 0.542808 |
| Q8NB90   | Spermatogenesis-associated protein 5                                                                  | 0.540596 |
| O43491   | Band 4.1-like protein 2                                                                               | 0.533298 |
| P46821   | Microtubule-associated protein 1B; MAP1 light chain LC1                                               | 0.523737 |
| Q96T88-2 | E3 ubiquitin-protein ligase UHRF1                                                                     | 0.510707 |
| Q13618   | Cullin-3                                                                                              | 0.492311 |
| P33991   | DNA replication licensing factor MCM4                                                                 | 0.464841 |
| Q09666   | Neuroblast differentiation-associated protein AHNAK                                                   | 0.455315 |
| P29966   | Myristoylated alanine-rich C-kinase substrate                                                         | 0.450045 |
| P57088   | Transmembrane protein 33                                                                              | 0.338399 |
| Q9C0C2   | 182 kDa tankyrase-1-binding protein                                                                   | 0.417544 |

**Supplementary Table S2.** Identification of KCTD12-interacting proteins by immunoprecipitation-mass spectrometry.

| Entrez Gene name                                                        | Symbol   |
|-------------------------------------------------------------------------|----------|
| Protein SET                                                             | SET      |
| ATP-dependent Clp protease ATP-binding subunit clpX-like, mitochondrial | CLPX     |
| Cyclin-dependent kinase 1                                               | CDK1     |
| Poly [ADP-ribose] polymerase 1                                          | PARP1    |
| Galectin-3-binding protein                                              | LGALS3BP |
| Twinfilin-1                                                             | TWF1     |
| Splicing factor 3A subunit 3                                            | SF3A3    |
| RNA-binding protein with serine-rich domain 1                           | RNPS1    |
| Endoplasmic reticulum-Golgi intermediate compartment protein 1          | ERGIC1   |
| Mitochondrial import receptor subunit TOM22 homolog                     | TOMM22   |
| ATPase family AAA domain-containing protein 3A                          | ATAD3A   |
| Proliferation-associated protein 2G4                                    | PA2G4    |
| RAC-gamma serine/threonine-protein kinase                               | AKT3     |
| Pyruvate dehydrogenase E1 component subunit beta, mitochondrial         | PDHB     |
| Glutathione S-transferase Mu 3                                          | GSTM3    |
| Transmembrane emp24 domain-containing protein 10                        | TMED10   |
| Ras-related protein Rab-7a                                              | RAB7A    |
| Arginine--tRNA ligase, cytoplasmic                                      | RARS     |
| Ras-related protein Rab-14                                              | RAB14    |
| Eukaryotic translation initiation factor 3 subunit I                    | EIF3I    |

**Supplementary Table S3.** siRNA sequences.

| siRNA         | Target sequence             |
|---------------|-----------------------------|
| si-KCTD12#1   | 5'-GGACAGCACACGTGGATTATT-3' |
| si-KCTD12#2   | 5'-GCAAAGGCCGCTTCTTTCTTT-3' |
| si-Aurora A#1 | 5'-TTCTTAGACTGTATGGTTATT-3' |
| si-Aurora A#2 | 5'-AATAGGAACACGTGCTCTATT-3' |
| si-CDC25B#1   | 5'-GGAAAAGGACCTCGTCATGTT-3' |
| si-CDC25B#2   | 5'-AGACTGCAGATACCCCTATT-3'  |
| si-Control    | 5'-TTCTCCGAACGTGTCACGTTT-3' |

**Supplementary Table S4.** Primers for site-directed mutagenesis.

| Plasmid                     | Primer                                          |
|-----------------------------|-------------------------------------------------|
| pCMV-N-flag-KCTD12<br>S185G | Forward:<br>5'-CTGGAGCTGGCTAGCCGCGGTCCGTCCGG-3' |
|                             | Reverse:<br>5'-CGCGGCTAGCCAGCTCCAGCGTGGGCGAC-3' |
| pCMV-N-flag-KCTD12<br>S187A | Forward:<br>5'-CTGGCTAGCCGCAGTCCGGCCGGGGGCGC-3' |
|                             | Reverse:<br>5'-CCGGACTGCGGCTAGCCAGCTCCAGCGTG-3' |
| pCMV-N-flag-KCTD12<br>S200A | Forward:<br>5'-CTGCTCACGCCGTCCCAGGCGCTGGACGG-3' |
|                             | Reverse:<br>5'-CCTGGGACGGCGTGAGCAGCGGGCCCGCC-3' |
| pCMV-N-flag-KCTD12<br>S243A | Forward:<br>5'-TGCGGAAAGACGGCGCTGGCCAAGGAG-3'   |
|                             | Reverse:<br>5'-CTCCTTGGCCAGCGCCGTCTTCCGCA-3'    |

## Supplementary Figure legends

**Supplementary Figure S1.** KCTD12 promotes lung cancer cell proliferation. **(a–b)** A549 cells were transfected with a KCTD12-expressing plasmid (1  $\mu$ g, 24 h) or an empty vector. KCTD12 expression was assessed by western blotting **(a)**, and the colony formation ability of the above cells was compared by colony formation assay **(b)**. **(c–d)** KCTD12 knockdown inhibits cell proliferation in A549 cells. Bars, SD; \*\*,  $P < 0.01$ ; \*\*\*,  $P < 0.001$  compared with control cells.

**Supplementary Figure S2.** KCTD12 is phosphorylated by Aurora A in M phase. **(a)** Western blotting analysis of KCTD12 expression in HeLa cells synchronized or unsynchronized to M phase. Note that the upward-shifted band of KCTD12 observed in M phase cells disappeared when the cell lysate was treated with CIP (10 U/ml cell lysate). **(b)** The upward shifted band of KCTD12 was also abolished in cells treated with VX-680 (0.5  $\mu$ M, 24 h). Red arrow, upward-shifted KCTD12 band.

**Supplementary Figure S3.** Serine 200 is not required for the cancer-promoting effects of KCTD12 in HeLa cells. **(a–b)** HeLa cells were transfected with a plasmid expressing wild-type KCTD12, a KCTD12 S200A mutant, or an empty control **(a)**, and colony formation assay was performed to compare the ability of these cells to form colonies **(b)**. Bars, SD; \*,  $P < 0.05$  compared with the cells transfected with the KCTD12-expressing plasmid; n.s, no significance.

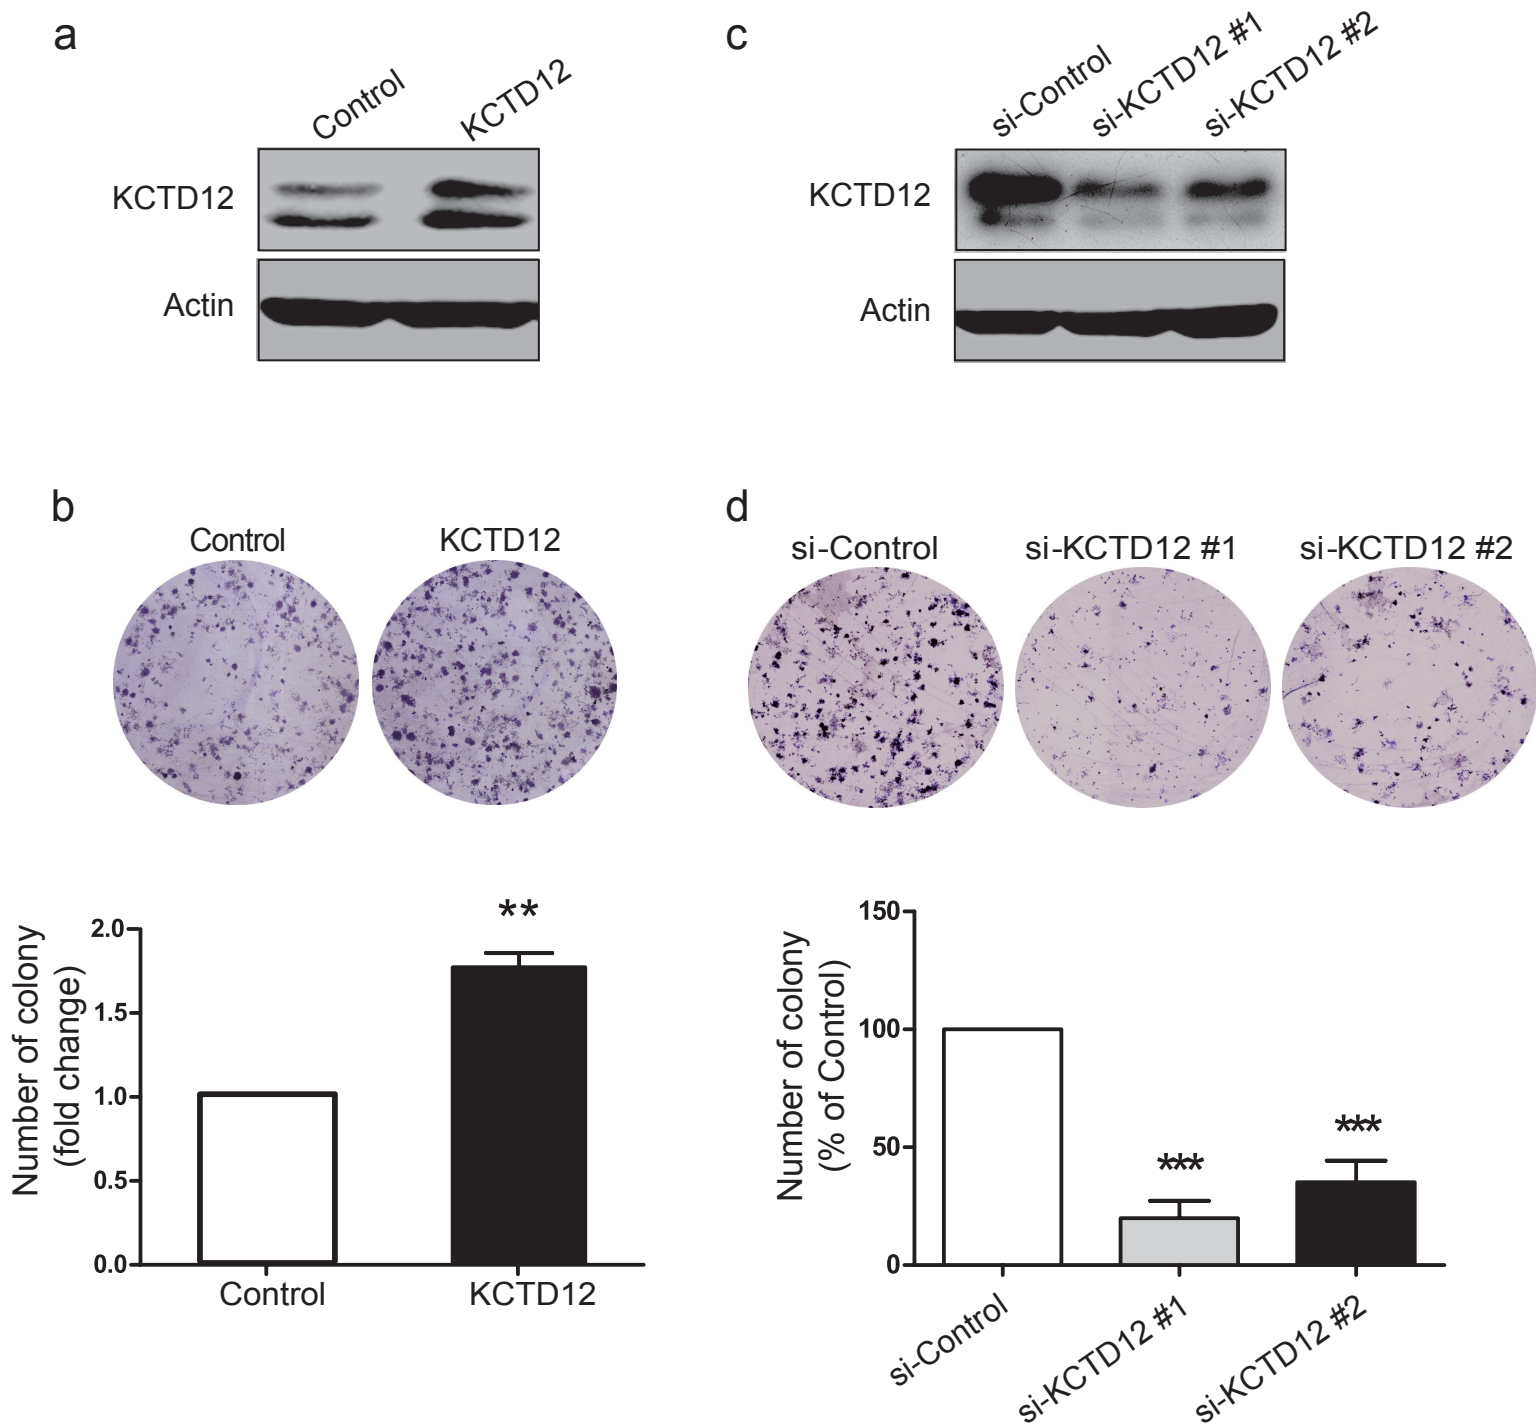

Supplementary Figure S1

a

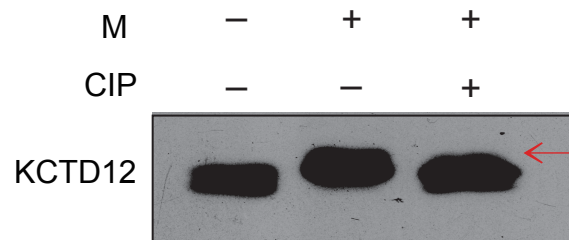

b

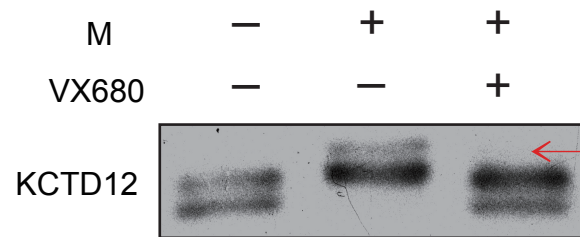

Supplementary Figure S2



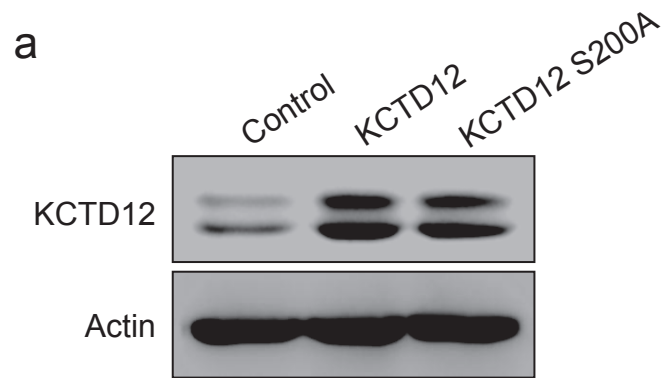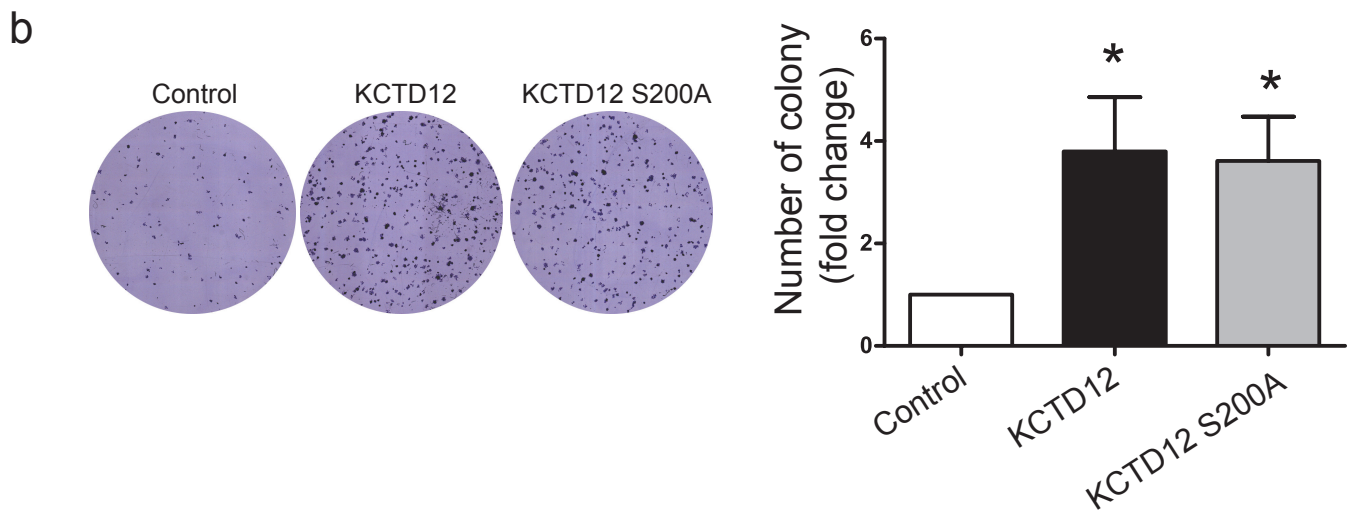

Supplementary Figure S3
